# Supplementary material
Source: publisher figshare collection journal article supplement (https://karger.figshare.com/ndownloader/files/21997002)
Supplement: Supplementary file 1 [file 21997002]

Supplementary Table 1. Bivariate and Multivariate analyses of the three models regarding workplace accommodations

|  | **Model 1a: requiring 2 or**  **more accommodations** | | | **Model 2b: difficulty arranging accommodation** | | | **Model 3c: not asking for needed accommodation** | | |
| --- | --- | --- | --- | --- | --- | --- | --- | --- | --- |
| **Variable** | **% required** | **Unadjusted OR (95% CI)** | **Adjusted OR (95% CI)** | **% had difficulty** | **Unadjusted OR (95% CI)** | **Adjusted OR (95% CI)** | **% did not ask** | **Unadjusted OR (95% CI))** | **Adjusted OR (95% CI)** |
| Sex  Maled  Female | 71.1  91.0 | **4.13 (1.43-11.89)*** | 3.63 (1.24-10.58) | 50.0  47.0 | 0.89 (0.39-2.00) |  | 50.0  42.4 | 0.74 (0.33-1.67) |  |
| IBD type  CDd  UC | 87.9  81.0 | 1.70 (0.52-5.57) |  | 49.3  45.2 | 0.85 (0.36-1.98) |  | 46.5  41.9 | 0.83 (0.36-1.95) |  |
| Age  <60d  >=60 | 83.7  78.6 | 0.72 (0.18-2.86) |  | 47.8  50.0 | 1.09 (0.33-3.65) |  | 45.6  41.7 | 0.85 (0.25-2.89) |  |
| Marital status  Married/living asd  Other | 81.8  84.8 | 1.23 (0.45-3.43) |  | 44.1  53.5 | 1.46 (0.66-3.21) |  | 35.6  58.1 | **2.51 (1.12-5.63)*** |  |
| Hospitalized  Nod  Yes | 74.1  85.9 | 2.13 (0.74-6.12) |  | 38.5  51.3 | 1.69 (0.68-4. 19) |  | 46.2  44.7 | 0.94 (0.39-2.309) |  |
| Surgery  Nod  Yes | 81.8  84.8 | 1.24 (0.45-3.43) |  | 47.5  48.8 | 1.05 (0.48-2.32) |  | 45.9  43.9 | 0.92 (0.42-2.05) |  |
| Effectiveness meds  Not  Somewhat  Highlyd | 100  84.4  78.6 | Chi Square = 0.298c |  | 62.5  65.9  30.0 | **Overall p = 0.003***  3.89 (0.82-18.39)  **4.50 (1.86-10.90)*** | **Overall p = 0.03***  1.38 (0.22-8.78)  **3.72 (1.41-9.78)*** | 62.5  56.1  34.0 | Overall p = 0.069  3.24 (0.69-15.19)  **2.48 (1.06-5.80)*** |  |
| Side effects  Nod  Yes | 82.5  82.8 | 1.02 (0.33-3.13) |  | 42.5  61.5 | 2.17 (0.87-5.42) |  | 38.4  65.4 | **3.04 (1.19-7.74)*** |  |
| Highest educatione  Noned  2nd  3rd  Trade | 71.4  78.8  94.1  64.7 | Overall p = 0.043*  1.49(0.24-9.36)  6.40(0.86-47.88)  0.73(0.11-4.99) |  | 42.9  43.8  56.3  33.3 | Overall p = 0.459  1.04 (0.20-5.41)  1.71 (0.35-8.51)  0.67 (0.10-4.54) |  | 28.6  40.6  52.1  41.7 | Overall p = 0.576  1.71 (0.29-10.20)  2.72 (0.48-15.40)  1.79 (0.24-13.215) |  |
| Active job  <50% actived  >50% active | 85.2  80.0 | 0.70 (0.25-1.93) |  | 49.0  46.7 | 0.91 (0.41-2.05) |  | 40.8  51.1 | 1.52 (0.67-3.43) |  |
| Symptom severity  Mild/moderated  Severe/very severe | 77.8  85.5 | 1.69 (0.61-4.65) |  | 35.3  54.4 | 2.18 (0.94-5.12) |  | 35.3  50.0 | 1.83 (0.78-4.29) |  |
| Workplace  Working away from homed  Home/self-employed | 86.6  68.4 | 0.33 (0.11-1.03) |  | 51.7  23.1 | 0.28 (0.07-1.08) |  | 48.3  15.4 | **0.20 (0.04-0.93)*** |  |
| K6 score (distress)  <6d  =6 | 83.6  81.8 | 0.88 (0.32-2.21) |  | 31.7  70.7 | **5.22 (2.20-12.39)*** | **4.41 (1.68-11.57)*** | 26.7  70.7 | **6.65 (2.75-16.07)*** | **5.47 (2.20-13.60)*** |
| IBD-SRf |  | 0.95 (0.86-1.04) |  |  | **0.89 (0.82-0.97)*** |  |  | **0.89 (0.82-0.96)*** |  |

a Model 1 investigates the correlation of characteristics with the need for at least two of seven accommodations.

b Model 2 assesses the characteristics associated with the difficulty arranging an accommodation. Patients were included that needed at least one type of workplace accommodation.

c Model 3 evaluates the characteristics that were correlated with not asking for an accommodation. Patients were included that needed at least one type of workplace accommodation.

d Reference group

e Education was divided into 4 groups: no education, 2nd = secondary/high school?, 3rd = tertiary/university? and trade.

f IBD-SR is displayed as a continues score
